# Supplementary material for: Assessment of Outcomes Associated With the Use of Newly Approved Oncology Drugs in Medicare Beneficiaries
Source: PubMed Central journal article supplement (PMC7905499; doi:10.1001/jamanetworkopen.2021.0030), 2021-02-24
Supplement: jamanetwopen-e210030-s001.pdf [file jamanetwopen-e210030-s001.pdf]

## Supplementary Online Content

Green AK, Curry M, Trivedi N, Bach PB, Mailankody S. Assessment of outcomes associated with the use of newly approved oncology drugs in Medicare beneficiaries. *JAMA Netw Open*. 2021;4(2):e210030. doi:10.1001/jamanetworkopen.2021.0030

**eFigure 1.** Flow Diagram of Selection of Cancer Drug Indications

**eFigure 2.** Median Overall Survival With 95% Confidence Intervals Comparing SEER-Medicare Patients With Charlson Comorbidity Index 0-1 and the Clinical Trial Intervention Arm Participants Receiving the Same FDA Approved Cancer Drug for the Same Indication

**eTable 1.** SEER-Medicare Inclusion Criteria for Cohort Selection

**eTable 2.** Cycle Estimates for Intravenous Cancer Drugs Used to Calculate Duration of Therapy and/or Single Cycles

**eTable 3.** Median Cancer-Specific Survival and Percent Deaths Due to Cancer Among SEER-Medicare Patients, Censored 12/31/2015

**eTable 4.** Age-Specific Median Overall Survival or Hazard Ratios for Clinical Trial Intervention Arms

This supplementary material has been provided by the authors to give readers additional information about their work.

**eFigure 1.** Flow Diagram of Selection of Cancer Drug Indications

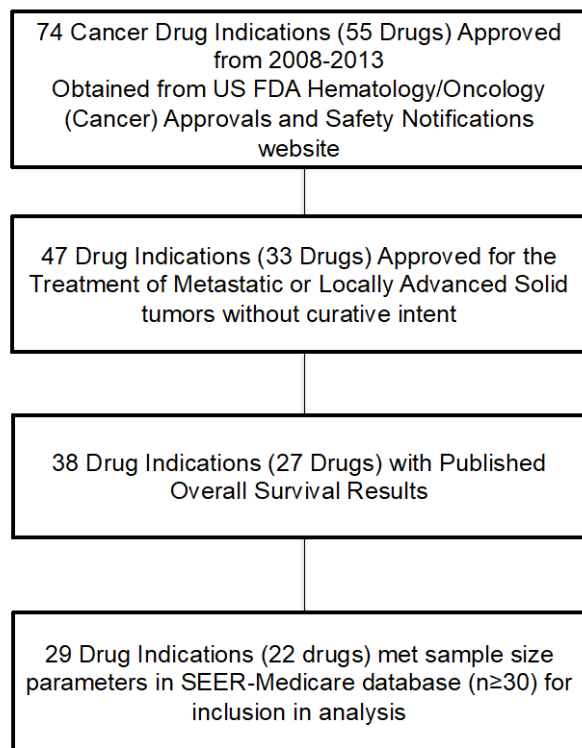

**eFigure 2.** Median Overall Survival With 95% Confidence Intervals Comparing SEER-Medicare Patients With Charlson Comorbidity Index 0-1 and the Clinical Trial Intervention Arm Participants Receiving the Same FDA Approved Cancer Drug for the Same Indication

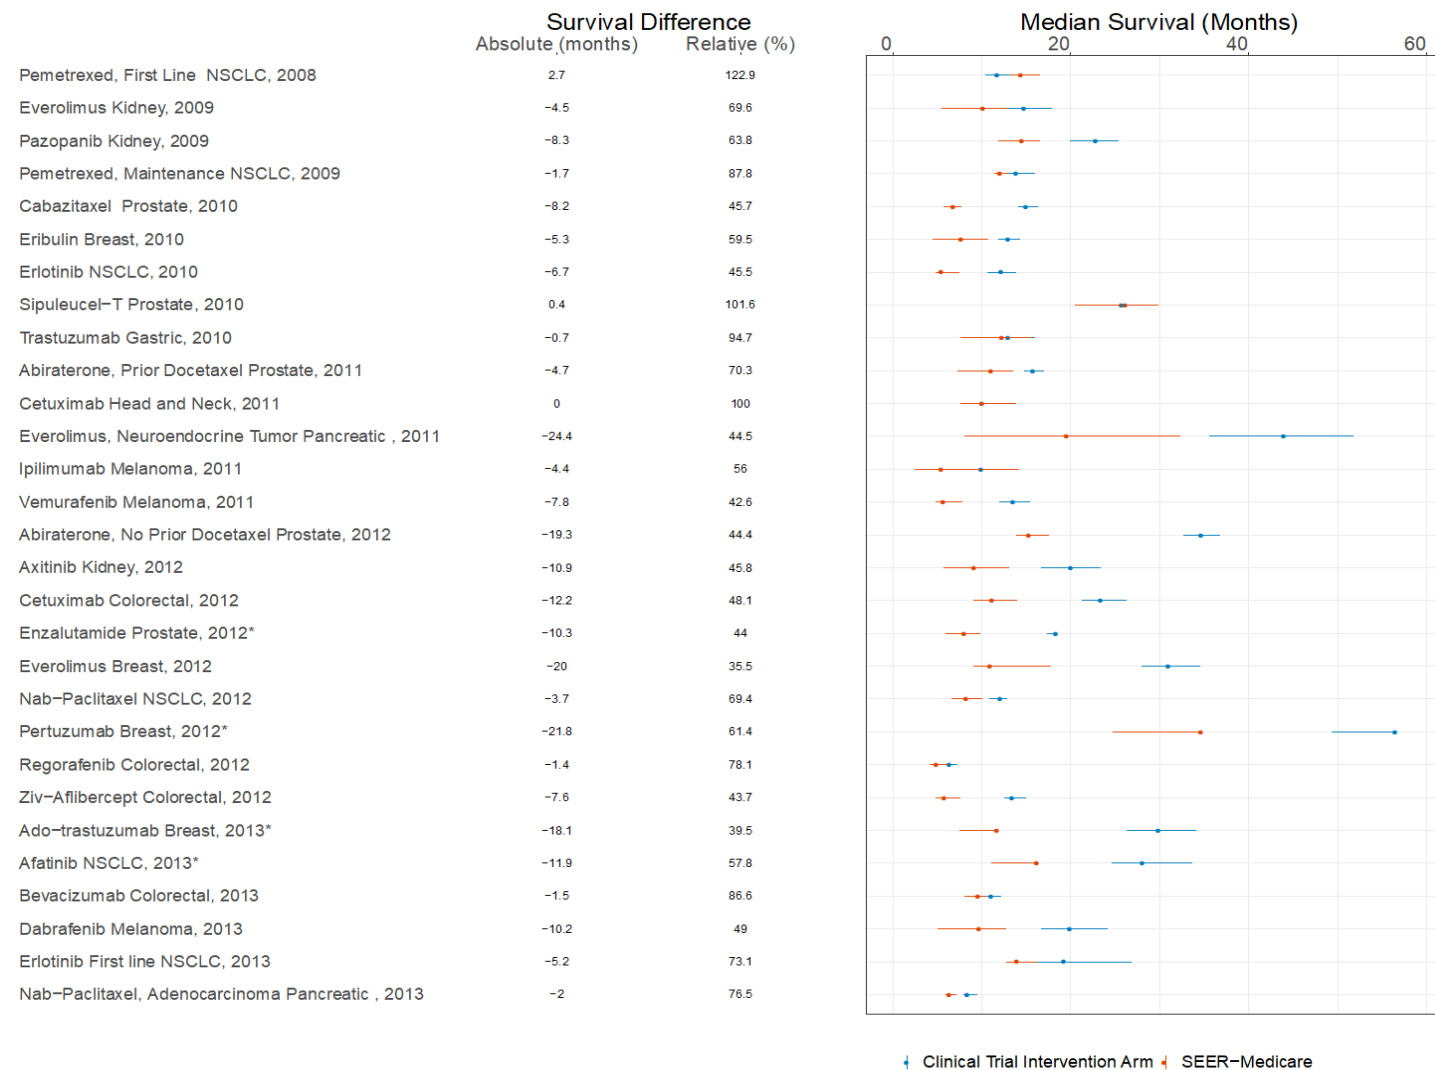

\*Upper confidence bound not reached, SEER-Medicare (CCI 0-1)

**eTable 1.** SEER-Medicare Inclusion Criteria for Cohort Selection

| Drug                         | Approval Year | FDA Approved Indication                                                                                                                                     | SEER-Medicare Population Inclusion Criteria                                                                                                                                                                                                                                                                                                                                                                                                                                                                          | Pivotal Cancer Clinical Trial                                                                                                                                                                                                                                                                      |
|------------------------------|---------------|-------------------------------------------------------------------------------------------------------------------------------------------------------------|----------------------------------------------------------------------------------------------------------------------------------------------------------------------------------------------------------------------------------------------------------------------------------------------------------------------------------------------------------------------------------------------------------------------------------------------------------------------------------------------------------------------|----------------------------------------------------------------------------------------------------------------------------------------------------------------------------------------------------------------------------------------------------------------------------------------------------|
| Pemetrexed, First Line NSCLC | 2008          | Pemetrexed for the initial treatment of patients with locally-advanced or metastatic non-squamous, non-small cell lung cancer in combination with cisplatin | <p>Non-squamous, non-small cell lung cancer</p> <p>Stage 4 at diagnosis</p> <p>Stage 3 at diagnosis with no surgery claim within 365 days of the minimum date of claim for pemetrexed (J9305)</p> <p>At least one claim for cisplatin (J9060) within 30 days of claim for pemetrexed (J9305)</p> <p>No prior claim for other intravenous systemic therapy (J9000-J9998), erlotinib, gefitinib, afatinib, crizotinib, alectinib, or ceritinib from date of diagnosis to minimum claim date for pemetrexed (J9305)</p> | <p><a href="https://ascopubs.org/doi/full/10.1200/JCO.2007.15.0375?url_ver=Z39.88-2003&amp;rfr_id=ori:rid:crossref.org&amp;rfr_dat=cr_pub%3dpubmed">https://ascopubs.org/doi/full/10.1200/JCO.2007.15.0375?url_ver=Z39.88-2003&amp;rfr_id=ori:rid:crossref.org&amp;rfr_dat=cr_pub%3dpubmed</a></p> |
| Everolimus, RCC              | 2009          | Everolimus for the treatment of advanced renal cell carcinoma after failure of treatment with sunitinib or sorafenib                                        | <p>Renal cell carcinoma</p> <p>Stage 4 at diagnosis</p> <p>Prior claim for sunitinib or sorafenib between date of diagnosis and minimum claim date for everolimus</p>                                                                                                                                                                                                                                                                                                                                                | <p>RECORD-1</p> <p><a href="http://www.thelancet.com/retrieve/pii/S0140673608610399">http://www.thelancet.com/retieve/pii/S0140673608610399</a></p> <p><a href="https://onlinelibrary.wiley.com/doi/full/10.1002/cncr.25219">https://onlinelibrary.wiley.com/doi/full/10.1002/cncr.25219</a></p>   |

| <b>Drug</b>                   | <b>Approval Year</b> | <b>FDA Approved Indication</b>                                                                                                                                                                                                            | <b>SEER-Medicare Population Inclusion Criteria</b>                                                                                                                                                                                                                                                                                                                                                                                                                                 | <b>Pivotal Cancer Clinical Trial</b>                                                                                                                                                                                                                                                        |
|-------------------------------|----------------------|-------------------------------------------------------------------------------------------------------------------------------------------------------------------------------------------------------------------------------------------|------------------------------------------------------------------------------------------------------------------------------------------------------------------------------------------------------------------------------------------------------------------------------------------------------------------------------------------------------------------------------------------------------------------------------------------------------------------------------------|---------------------------------------------------------------------------------------------------------------------------------------------------------------------------------------------------------------------------------------------------------------------------------------------|
| Pazopanib, RCC                | 2009                 | Pazopanib for the treatment of patients with advanced renal cell carcinoma                                                                                                                                                                | <p>Renal cell carcinoma</p> <p>Stage 3 at diagnosis with no prior surgery within 365 days of the minimum claim date for pazopanib</p> <p>Stage 4 at diagnosis</p> <p>No prior claim for sunitinib, sorafenib, everolimus, or intravenous systemic therapy (J9000-J9998) between date of diagnosis and minimum claim date for pazopanib</p>                                                                                                                                         | <a href="https://ascopubs.org/doi/full/10.1200/JCO.2009.23.9764?url_ver=Z39.88-2003&amp;rfr_id=ori:rid:crossref.org&amp;rfr_dat=cr_pub%3dpubmed">https://ascopubs.org/doi/full/10.1200/JCO.2009.23.9764?url_ver=Z39.88-2003&amp;rfr_id=ori:rid:crossref.org&amp;rfr_dat=cr_pub%3dpubmed</a> |
| Pemetrexed, Maintenance NSCLC | 2009                 | Pemetrexed as maintenance treatment of patients with locally advanced or metastatic, non-squamous non-small cell lung cancer whose disease has not progressed after 4 cycles of platinum-based first-line chemotherapy, as a single agent | <p>Non-squamous, non-small cell lung cancer</p> <p>Stage 4 at diagnosis</p> <p>Stage 3 at diagnosis with no surgery claim within 365 days of the minimum date of claim for pemetrexed (J9305)</p> <p>Prior concurrent platinum therapy as defined by a claim for cisplatin (J9060) or carboplatin (J9045) plus pemetrexed within 30 days of each other AND claim for pemetrexed (J9305) alone within 60 days after platinum (cisplatin or carboplatin) plus pemetrexed (J9305)</p> | <p>PARAMOUNT</p> <p><a href="http://citeseerx.ist.psu.edu/viewdoc/download?doi=10.1.1.1007.6831&amp;rep=rep1&amp;type=pdf">http://citeseerx.ist.psu.edu/viewdoc/download?doi=10.1.1.1007.6831&amp;rep=rep1&amp;type=pdf</a></p>                                                             |

| <b>Drug</b>                  | <b>Approval Year</b> | <b>FDA Approved Indication</b>                                                                                                                                                                             | <b>SEER-Medicare Population Inclusion Criteria</b>                                                                                                                                                                                                                                                                                                                 | <b>Pivotal Cancer Clinical Trial</b>                                                                                                                                                            |
|------------------------------|----------------------|------------------------------------------------------------------------------------------------------------------------------------------------------------------------------------------------------------|--------------------------------------------------------------------------------------------------------------------------------------------------------------------------------------------------------------------------------------------------------------------------------------------------------------------------------------------------------------------|-------------------------------------------------------------------------------------------------------------------------------------------------------------------------------------------------|
|                              |                      |                                                                                                                                                                                                            | No prior claim for other intravenous systemic therapy (J9000-J9998), erlotinib, gefitinib, afatinib, crizotinib, alectinib, or ceritinib from date of diagnosis to minimum claim date for [carboplatin or cisplatin] or pemetrexed (J9305)                                                                                                                         |                                                                                                                                                                                                 |
| Cabazitaxel, mCRPC           | 2010                 | Cabazitaxel in combination with prednisone for the treatment of patients with hormone-refractory metastatic prostate cancer previously treated with a docetaxel-containing regimen.                        | Prostate adenocarcinoma<br>Stage 4 at diagnosis<br>No prior claim for mitoxantrone (J9293)<br>Prior claim for docetaxel (J9170, J9171) from date of diagnosis to minimum date of claim for cabazitaxel (J9043)                                                                                                                                                     | TROPIC<br><a href="https://www.thelancet.com/journals/lancet/article/PIIS0140-6736(10)61389-X/fulltext">https://www.thelancet.com/journals/lancet/article/PIIS0140-6736(10)61389-X/fulltext</a> |
| Erlotinib, maintenance NSCLC | 2010                 | Erlotinib as maintenance treatment of patients with locally advanced or metastatic non-small cell lung cancer whose disease has not progressed after four cycles of platinum-based first-line chemotherapy | Non-small cell lung cancer<br>Stage 4 at diagnosis<br><br>Stage 3 at diagnosis with no surgery claim within 365 days of the minimum date of claim for cisplatin (J9060) or carboplatin (J9045)<br><br>Prior platinum chemotherapy as defined by a claim for cisplatin (J9060) or carboplatin (J9045) from date of diagnosis to minimum date of claim for erlotinib | SATURN<br><a href="https://www.sciencedirect.com/science/article/pii/S1470204510701121?via%3Dihub">https://www.sciencedirect.com/science/article/pii/S1470204510701121?via%3Dihub</a>           |

| <b>Drug</b>                 | <b>Approval Year</b> | <b>FDA Approved Indication</b>                                                                                                                                                                                                                  | <b>SEER-Medicare Population Inclusion Criteria</b>                                                                                                                                                                                                                                                                                                                                                                                                                                                                 | <b>Pivotal Cancer Clinical Trial</b>                                                                                                                                                                |
|-----------------------------|----------------------|-------------------------------------------------------------------------------------------------------------------------------------------------------------------------------------------------------------------------------------------------|--------------------------------------------------------------------------------------------------------------------------------------------------------------------------------------------------------------------------------------------------------------------------------------------------------------------------------------------------------------------------------------------------------------------------------------------------------------------------------------------------------------------|-----------------------------------------------------------------------------------------------------------------------------------------------------------------------------------------------------|
|                             |                      |                                                                                                                                                                                                                                                 | Claim for erlotinib within 60 days of maximum claim for cisplatin (J9060) or carboplatin (J9045)                                                                                                                                                                                                                                                                                                                                                                                                                   |                                                                                                                                                                                                     |
| Eribulin, breast cancer     | 2010                 | Treatment of patients with metastatic breast cancer who have previously received an anthracycline and a taxane in either the adjuvant or metastatic setting, and at least two chemotherapeutic regimens for the treatment of metastatic disease | Breast cancer<br>Stage 4 at diagnosis<br>Previous claim for [taxane – paclitaxel (J9267, J9265) OR docetaxel (J9170, J9171) OR nab-paclitaxel (J9264)] AND [anthracycline – doxorubicin (J9000), liposomal doxorubicin (J9001, J9002)] from date of diagnosis to date of claim for eribulin (J9179)                                                                                                                                                                                                                | EMBRACE<br><a href="https://www.thelancet.com/journals/lancet/article/PIIS0140-6736(11)60070-6/fulltext">https://www.thelancet.com/journals/lancet/article/PIIS0140-6736(11)60070-6/fulltext</a>    |
| Trastuzumab, gastric cancer | 2010                 | In combination with chemotherapy for first-line treatment of HER2-positive advanced gastric or gastro-oesophageal junction cancer.                                                                                                              | Adenocarcinoma of the stomach or gastro-esophageal junction<br>Stage 3 at diagnosis with no surgery<br>claim within 365 days of the minimum date of claim for trastuzumab (J9355)<br>No prior claim for intravenous systemic therapy (J9000-J9998) or capecitabine (J8520) between date of diagnosis and minimum claim date for trastuzumab (J9355)<br>At least one claim for [capecitabine (J8520, J8521) OR fluorouracil (J9190)] AND cisplatin (J9060, J9062) within 30 days of a claim for trastuzumab (J9355) | ToGA Trial<br><a href="https://www.thelancet.com/journals/lancet/article/PIIS0140-6736(10)61121-X/fulltext">https://www.thelancet.com/journals/lancet/article/PIIS0140-6736(10)61121-X/fulltext</a> |

| Drug                               | Approval Year | FDA Approved Indication                                                                                                                                                                                                                  | SEER-Medicare Population Inclusion Criteria                                                                                                                          | Pivotal Cancer Clinical Trial                                                                                                                                                                                                                                                                                                                                                                                                                          |
|------------------------------------|---------------|------------------------------------------------------------------------------------------------------------------------------------------------------------------------------------------------------------------------------------------|----------------------------------------------------------------------------------------------------------------------------------------------------------------------|--------------------------------------------------------------------------------------------------------------------------------------------------------------------------------------------------------------------------------------------------------------------------------------------------------------------------------------------------------------------------------------------------------------------------------------------------------|
| Sipuleucel-T, CRPC                 | 2010          | Indicated for the treatment of asymptomatic or minimally symptomatic metastatic castrate resistant (hormone refractory) prostate cancer.                                                                                                 | Prostate adenocarcinoma<br>Stage 4 at diagnosis                                                                                                                      | IMPACT<br><a href="https://www.nejm.org/doi/full/10.1056/NEJMoa1001294">https://www.nejm.org/doi/full/10.1056/NEJMoa1001294</a>                                                                                                                                                                                                                                                                                                                        |
| Everolimus, pancreatic NET         | 2011          | Everolimus for the treatment of progressive neuroendocrine tumors of pancreatic origin that is locally advanced or metastatic. The safety and effectiveness in the treatment of patients with carcinoid tumors has not been established. | Pancreatic neuroendocrine tumor<br>Stage 4 at diagnosis<br>Stage 3 at diagnosis with no surgery<br>claim within 365 days of the minimum date of claim for everolimus | RADIANT-3<br><a href="https://ascopubs.org/doi/full/10.1200/JCO.2016.68.0702?url_ver=Z39.88-2003&amp;rfr_id=ori:rid:crossref.org&amp;rfr_dat=cr_pub%3dpubmed">https://ascopubs.org/doi/full/10.1200/JCO.2016.68.0702?url_ver=Z39.88-2003&amp;rfr_id=ori:rid:crossref.org&amp;rfr_dat=cr_pub%3dpubmed</a><br><a href="https://www.nejm.org/doi/10.1056/NEJMoa1009290">https://www.nejm.org/doi/10.1056/NEJMoa1009290</a>                                |
| Abiraterone, CRPC, prior docetaxel | 2011          | Abiraterone in combination with prednisone for the treatment of patients with metastatic castration-resistant prostate cancer who have received prior chemotherapy containing docetaxel                                                  | Prostate adenocarcinoma<br>Stage 4 at diagnosis<br>Prior claim for docetaxel (J9170, J9171) from date of diagnosis to minimum date of claim abiraterone              | COU-AA-301<br><a href="https://www.nejm.org/doi/10.1056/NEJMoa1014618?url_ver=Z39.88-2003&amp;rfr_id=ori:rid:crossref.org&amp;rfr_dat=cr_pub%3dwww.ncbi.nlm.nih.gov">https://www.nejm.org/doi/10.1056/NEJMoa1014618?url_ver=Z39.88-2003&amp;rfr_id=ori:rid:crossref.org&amp;rfr_dat=cr_pub%3dwww.ncbi.nlm.nih.gov</a><br><a href="http://www.thelancet.com/retrieve/pii/S1470204512703790">http://www.thelancet.com/retrieve/pii/S1470204512703790</a> |
| Vemurafenib, melanoma              | 2011          | Treatment-naive <i>BRAF</i> V600 mutation–positive metastatic melanoma                                                                                                                                                                   | Melanoma (cutaneous)<br>Stage 4 at diagnosis<br><br>Stage 3 at diagnosis with no surgery<br>claim within 365 days of the                                             | BRIM-3<br><a href="https://www.ncbi.nlm.nih.gov/pmc/articles/PMC5834156/">https://www.ncbi.nlm.nih.gov/pmc/articles/PMC5834156/</a>                                                                                                                                                                                                                                                                                                                    |



| <b>Drug</b>                     | <b>Approval Year</b> | <b>FDA Approved Indication</b>                                                                                                                                                                                  | <b>SEER-Medicare Population Inclusion Criteria</b>                                                                                                                                                                                                                                                                                                                                                                  | <b>Pivotal Cancer Clinical Trial</b>                                                                                                                                                                                                                                                                           |
|---------------------------------|----------------------|-----------------------------------------------------------------------------------------------------------------------------------------------------------------------------------------------------------------|---------------------------------------------------------------------------------------------------------------------------------------------------------------------------------------------------------------------------------------------------------------------------------------------------------------------------------------------------------------------------------------------------------------------|----------------------------------------------------------------------------------------------------------------------------------------------------------------------------------------------------------------------------------------------------------------------------------------------------------------|
|                                 |                      |                                                                                                                                                                                                                 | <p>minimum date of claim for vemurafenib</p> <p>No prior claim for dacarbazine (J9130), temozolomide (J9328), carboplatin (J9045), or interleukin-2 (00.15)</p>                                                                                                                                                                                                                                                     | <a href="https://www.nejm.org/doi/full/10.1056/NEJMoa1103782">https://www.nejm.org/doi/full/10.1056/NEJMoa1103782</a>                                                                                                                                                                                          |
| Cetuximab, head and neck cancer | 2011                 | Use in combination with platinum-based therapy plus fluorouracil (5-FU) for the first-line treatment of patients with recurrent locoregional disease or metastatic squamous cell carcinoma of the head and neck | <p>Squamous cell carcinoma of the head and neck</p> <p>Stage 4 at diagnosis</p> <p>At least one claim for [Cisplatin (J9060) OR carboplatin (J9045)] AND fluorouracil (J9190) within 30 days of a claim for cetuximab (J9055)</p> <p>Exclude nasopharyngeal cancers</p> <p>No prior claim for intravenous systemic therapy (J9000-J9998) between date of diagnosis and minimum claim date for cetuximab (J9055)</p> | <p>EXTREME</p> <p><a href="https://www.nejm.org/doi/full/10.1056/NEJMoa0802656">https://www.nejm.org/doi/full/10.1056/NEJMoa0802656</a></p>                                                                                                                                                                    |
| Ipilimumab, melanoma            | 2011                 | Unresectable or metastatic melanoma who had received at least one prior systemic treatment                                                                                                                      | <p>Melanoma (cutaneous)</p> <p>Stage 4 at diagnosis</p> <p>Stage 3 at diagnosis with no surgery claim within 365 days of the minimum date of claim for ipilimumab (J9228)</p> <p>Previous claim for at least one of the following from date of diagnosis to minimum date of claim for ipilimumab (J9228): dacarbazine</p>                                                                                           | <p><a href="https://www.nejm.org/doi/10.1056/NEJMoa1003466?url_ver=Z39.88-2003&amp;rfr_id=ori:rid:crossref.org&amp;rfr_dat=cr_pub%3dwww.ncbi.nlm.nih.gov">https://www.nejm.org/doi/10.1056/NEJMoa1003466?url_ver=Z39.88-2003&amp;rfr_id=ori:rid:crossref.org&amp;rfr_dat=cr_pub%3dwww.ncbi.nlm.nih.gov</a></p> |

| <b>Drug</b>           | <b>Approval Year</b> | <b>FDA Approved Indication</b>                                                                                                                                                                                                   | <b>SEER-Medicare Population Inclusion Criteria</b>                                                                                                                                                                                                                  | <b>Pivotal Cancer Clinical Trial</b>                                                                                                                                                                                                                                                                                                                                                       |
|-----------------------|----------------------|----------------------------------------------------------------------------------------------------------------------------------------------------------------------------------------------------------------------------------|---------------------------------------------------------------------------------------------------------------------------------------------------------------------------------------------------------------------------------------------------------------------|--------------------------------------------------------------------------------------------------------------------------------------------------------------------------------------------------------------------------------------------------------------------------------------------------------------------------------------------------------------------------------------------|
|                       |                      |                                                                                                                                                                                                                                  | (J9130), temozolomide (J9328), carboplatin (J9045), or interleukin-2<br>Exclude ocular melanoma                                                                                                                                                                     |                                                                                                                                                                                                                                                                                                                                                                                            |
| Everolimus, Breast    | 2012                 | Everolimus for the treatment of postmenopausal women with advanced hormone receptor-positive, HER2-negative breast cancer in combination with exemestane after failure of treatment with letrozole or anastrozole.               | Breast ductal or lobular carcinoma<br>Stage 4 at diagnosis<br>Prior claim for anastrozole and/or letrozole<br>At least one claim for exemestane within 30 days of a claim for everolimus                                                                            | BOLERO-2<br><a href="https://www.nejm.org/doi/full/10.1056/nejmoa1109653">https://www.nejm.org/doi/full/10.1056/nejmoa1109653</a>                                                                                                                                                                                                                                                          |
| Axitinib, RCC         | 2012                 | Axitinib for the treatment of advanced renal cell carcinoma after failure of one prior systemic therapy.                                                                                                                         | Renal cell carcinoma<br>Stage 4 at diagnosis<br>Prior claim for sunitinib, bevacizumab (J9035) plus interferon-alpha (J9213), or temsirolimus (J9330), or interleukin-2 (00.15) between date of diagnosis and minimum claim date for axitinib                       | AXIS<br><a href="https://www.thelancet.com/journals/lanonc/article/PIIS1470-2045(13)70093-7/fulltext">https://www.thelancet.com/journals/lanonc/article/PIIS1470-2045(13)70093-7/fulltext</a><br><br><a href="https://www.thelancet.com/journals/lancet/article/PIIS0140-6736(11)61613-9/fulltext">https://www.thelancet.com/journals/lancet/article/PIIS0140-6736(11)61613-9/fulltext</a> |
| Nab-Paclitaxel, NSCLC | 2012                 | Nab-Paclitaxel for treatment of locally advanced or metastatic non-small cell lung cancer, as first-line treatment in combination with carboplatin, in patients who are not candidates for curative surgery or radiation therapy | Non-small cell lung cancer<br><br>Stage 4 at diagnosis<br><br>Stage 3 at diagnosis with no prior surgery within 365 days of the minimum claim date for nab-paclitaxel (J9264), or no prior radiation claims lasting greater than 3 weeks from date of diagnosis and | <a href="http://ascopubs.org/doi/full/10.1200/JCO.2011.39.5848?url_ver=Z39.88-2003&amp;rfr_id=ori:rid:crossref.org&amp;rfr_dat=cr_pub%3dpubmed">http://ascopubs.org/doi/full/10.1200/JCO.2011.39.5848?url_ver=Z39.88-2003&amp;rfr_id=ori:rid:crossref.org&amp;rfr_dat=cr_pub%3dpubmed</a>                                                                                                  |

| <b>Drug</b>                    | <b>Approval Year</b> | <b>FDA Approved Indication</b>                                                                                                         | <b>SEER-Medicare Population Inclusion Criteria</b>                                                                                                                                                                                                                                                                                                                       | <b>Pivotal Cancer Clinical Trial</b>                                                                                                                                                                                                                                                                              |
|--------------------------------|----------------------|----------------------------------------------------------------------------------------------------------------------------------------|--------------------------------------------------------------------------------------------------------------------------------------------------------------------------------------------------------------------------------------------------------------------------------------------------------------------------------------------------------------------------|-------------------------------------------------------------------------------------------------------------------------------------------------------------------------------------------------------------------------------------------------------------------------------------------------------------------|
|                                |                      |                                                                                                                                        | <p>minimum claim date for nab-paclitaxel (J9264)</p> <p>No prior claim for intravenous systemic therapy (J9000-J9998), erlotinib, gefitinib, afatinib, crizotinib, alectinib, or ceritinib between date of diagnosis to minimum claim date for nab-paclitaxel (J9264)</p> <p>At least one claim for carboplatin within 30 days of a claim for nab-paclitaxel (J9264)</p> |                                                                                                                                                                                                                                                                                                                   |
| Enzalutamide, CRPC             | 2012                 | Enzalutamide for the treatment of patients with metastatic castration-resistant prostate cancer who have previously received docetaxel | Prostate adenocarcinoma Stage 4 at diagnosis<br>Prior claim for docetaxel (J9170, J9171) from date of diagnosis to minimum date of claim for enzalutamide                                                                                                                                                                                                                | AFFIRM<br><a href="https://www.nejm.org/doi/10.1056/NEJMoa1207506?url_ver=Z39.88-2003&amp;rfr_id=ori:rid:crossref.org&amp;rfr_dat=cr_pub%3dwww.ncbi.nlm.nih.gov">https://www.nejm.org/doi/10.1056/NEJMoa1207506?url_ver=Z39.88-2003&amp;rfr_id=ori:rid:crossref.org&amp;rfr_dat=cr_pub%3dwww.ncbi.nlm.nih.gov</a> |
| Abiraterone, CRPC              | 2012                 | Abiraterone in combination with prednisone for the treatment of patients with metastatic castration-resistant prostate cancer          | Prostate adenocarcinoma Stage 4 at diagnosis                                                                                                                                                                                                                                                                                                                             | COU-AA-302<br><a href="https://www.thelancet.com/journals/lanonc/article/PIIS1470-2045(14)71205-7/fulltext">https://www.thelancet.com/journals/lanonc/article/PIIS1470-2045(14)71205-7/fulltext</a>                                                                                                               |
| Regorafenib, Colorectal cancer | 2012                 | Metastatic colorectal cancer who have been previously treated with fluoropyrimidine-, oxaliplatin-, and irinotecan-                    | Colon or rectal cancer Stage 4 at diagnosis<br>Prior claim for a fluoropyrimidine [fluorouracil (J9190) OR capecitabine (J8520)], oxaliplatin (J9263),                                                                                                                                                                                                                   | CORRECT<br><a href="https://www.thelancet.com/journals/lancet/article/PIIS0140-6736(12)61900-X/fulltext">https://www.thelancet.com/journals/lancet/article/PIIS0140-6736(12)61900-X/fulltext</a>                                                                                                                  |

| <b>Drug</b>                  | <b>Approval Year</b> | <b>FDA Approved Indication</b>                                                                                                                                                                                                             | <b>SEER-Medicare Population Inclusion Criteria</b>                                                                                                                                                                                                                                                                                               | <b>Pivotal Cancer Clinical Trial</b>                                                                                                                                                                                                                                                                                                                                                                                                |
|------------------------------|----------------------|--------------------------------------------------------------------------------------------------------------------------------------------------------------------------------------------------------------------------------------------|--------------------------------------------------------------------------------------------------------------------------------------------------------------------------------------------------------------------------------------------------------------------------------------------------------------------------------------------------|-------------------------------------------------------------------------------------------------------------------------------------------------------------------------------------------------------------------------------------------------------------------------------------------------------------------------------------------------------------------------------------------------------------------------------------|
|                              |                      | based chemotherapy, an anti-VEGF therapy, and, if KRAS wild type, an anti-EGFR therapy.                                                                                                                                                    | irinotecan (J9206), AND bevacizumab (J9035) since date of diagnosis and prior to claim for regorafenib                                                                                                                                                                                                                                           |                                                                                                                                                                                                                                                                                                                                                                                                                                     |
| Cetuximab, colorectal cancer | 2012                 | First-line treatment of patients with KRAS mutation-negative (commonly known as KRAS wild-type), epidermal growth factor receptor (EGFR)-expressing metastatic colorectal cancer (mCRC) as determined by FDA-approved tests for this use   | Colon or rectal adenocarcinoma Stage 4 at diagnosis<br>At least one claim for irinotecan (J9206) AND fluorouracil (J9190) within 30 days of a claim for cetuximab (J9055)<br>No prior claim for intravenous systemic therapy (J9000-J9998) or capecitabine (J8520) between date of diagnosis and minimum claim date for cetuximab (J9055)        | CRYSTAL<br><a href="https://www.nejm.org/doi/full/10.1056/NEJMoa0805019">https://www.nejm.org/doi/full/10.1056/NEJMoa0805019</a><br><br><a href="https://ascopubs.org/doi/full/10.1200/JCO.2010.33.5091?url_ver=Z39.88-2003&amp;rfr_id=ori:rid:crossref.org&amp;rfr_dat=cr_pub%3dpubmed">https://ascopubs.org/doi/full/10.1200/JCO.2010.33.5091?url_ver=Z39.88-2003&amp;rfr_id=ori:rid:crossref.org&amp;rfr_dat=cr_pub%3dpubmed</a> |
| Pertuzumab, breast cancer    | 2012                 | In combination with Herceptin (trastuzumab) and docetaxel chemotherapy for the treatment of people with HER2-positive metastatic breast cancer (mBC) who have not received prior anti-HER2 therapy or chemotherapy for metastatic disease. | Breast cancer<br>Stage IV at diagnosis<br>No prior claim for intravenous systemic therapy (J9000-J9998) or lapatinib or capecitabine (J8520) between date of diagnosis and minimum claim date for pertuzumab (J9306)<br>At least one claim for trastuzumab (J9355) and docetaxel (J9170, J9171) within 30 days of a claim for pertuzumab (J9306) | CLEOPATRA<br><a href="https://www.nejm.org/doi/full/10.1056/NEJMoa1413513">https://www.nejm.org/doi/full/10.1056/NEJMoa1413513</a>                                                                                                                                                                                                                                                                                                  |
| Ziv-Aflibercept              | 2012                 | Treatment of metastatic colorectal cancer (mCRC) that is resistant to or has                                                                                                                                                               | Colon or rectal adenocarcinoma Stage 4 at diagnosis                                                                                                                                                                                                                                                                                              | VELOUR<br><a href="http://ascopubs.org/doi/full/10.1200/JCO.2012.42.8201?url">http://ascopubs.org/doi/full/10.1200/JCO.2012.42.8201?url</a>                                                                                                                                                                                                                                                                                         |

| <b>Drug</b>                    | <b>Approval Year</b> | <b>FDA Approved Indication</b>                                                                                                                 | <b>SEER-Medicare Population Inclusion Criteria</b>                                                                                                                                                                                                                                                                                                                        | <b>Pivotal Cancer Clinical Trial</b>                                                                                                                                                                                                                                                                                                                                                                                                                                                                                      |
|--------------------------------|----------------------|------------------------------------------------------------------------------------------------------------------------------------------------|---------------------------------------------------------------------------------------------------------------------------------------------------------------------------------------------------------------------------------------------------------------------------------------------------------------------------------------------------------------------------|---------------------------------------------------------------------------------------------------------------------------------------------------------------------------------------------------------------------------------------------------------------------------------------------------------------------------------------------------------------------------------------------------------------------------------------------------------------------------------------------------------------------------|
| colorectal cancer              |                      | progressed following an oxaliplatin-containing regimen                                                                                         | <p>Prior claim for oxaliplatin (J9263) from date of diagnosis to minimum date of claim for ziv-aflibercept (J9400)</p> <p>At least one claim for irinotecan (J9206) AND fluorouracil (J9190) within 30 days of a claim for ziv-aflibercept (J9400)</p> <p>Exclude if prior claim for irinotecan from date of diagnosis to date of claim for ziv-aflibercept (J9400)</p>   | <a href="https://pubmed.ncbi.nlm.nih.gov/2003/ver=Z39.88-2003&amp;rfr_id=ori:rid:crossref.org&amp;rfr_dat=cr_pub%3dpubmed">1 ver=Z39.88-2003&amp;rfr_id=ori:rid:crossref.org&amp;rfr_dat=cr_pub%3dpubmed</a>                                                                                                                                                                                                                                                                                                              |
| Ado-Trastuzumab, breast cancer | 2013                 | For patients with HER2-positive, late-stage (metastatic) breast cancer.                                                                        | <p>Breast cancer</p> <p>Stage 4 at diagnosis</p> <p>Stage 3 at diagnosis with no surgery claim within 365 days of the minimum date for ado-trastuzumab (J9354)</p> <p>Prior claim for trastuzumab (J9355) AND [paclitaxel (J9265, J9267), docetaxel (J9170, J9171) OR nab-paclitaxel (J9264)]</p> <p>No prior treatment with lapatinib or capecitabine (J8520, J8521)</p> | <p>EMILIA</p> <p><a href="https://www.nejm.org/doi/10.1056/NEJMoal209124?url_ver=Z39.88-2003&amp;rfr_id=ori:rid:crossref.org&amp;rfr_dat=cr_pub%3dwww.ncbi.nlm.nih.gov">https://www.nejm.org/doi/10.1056/NEJMoal209124?url_ver=Z39.88-2003&amp;rfr_id=ori:rid:crossref.org&amp;rfr_dat=cr_pub%3dwww.ncbi.nlm.nih.gov</a></p> <p><a href="https://www.thelancet.com/journals/lanonc/article/PIIS1470-2045(17)30312-1/fulltext">https://www.thelancet.com/journals/lanonc/article/PIIS1470-2045(17)30312-1/fulltext</a></p> |
| Dabrafenib, Melanoma           | 2013                 | Indicated for the treatment of patients with unresectable or metastatic melanoma with BRAF V600E mutation as detected by an FDA-approved test. | <p>Melanoma, cutaneous</p> <p>Stage 4 at diagnosis</p> <p>Stage 3 at diagnosis with no surgery claim within 365 days of the minimum date of claim for dabrafenib</p>                                                                                                                                                                                                      | <p>BREAK-3</p> <p><a href="https://www.sciencedirect.com/science/article/pii/S014067361260868X?via%3Dihub">https://www.sciencedirect.com/science/article/pii/S014067361260868X?via%3Dihub</a></p>                                                                                                                                                                                                                                                                                                                         |

| <b>Drug</b>                | <b>Approval Year</b> | <b>FDA Approved Indication</b>                                                                                                                                                                                                                                                    | <b>SEER-Medicare Population Inclusion Criteria</b>                                                                                                                                                                                                                                                                                                                   | <b>Pivotal Cancer Clinical Trial</b>                                                                                                                                                                                                                                                                                                                                     |
|----------------------------|----------------------|-----------------------------------------------------------------------------------------------------------------------------------------------------------------------------------------------------------------------------------------------------------------------------------|----------------------------------------------------------------------------------------------------------------------------------------------------------------------------------------------------------------------------------------------------------------------------------------------------------------------------------------------------------------------|--------------------------------------------------------------------------------------------------------------------------------------------------------------------------------------------------------------------------------------------------------------------------------------------------------------------------------------------------------------------------|
|                            |                      |                                                                                                                                                                                                                                                                                   | No prior claim for intravenous systemic therapy (J9000-J9998), except interleukin-2, between date of diagnosis and date of claim for dabrafenib                                                                                                                                                                                                                      |                                                                                                                                                                                                                                                                                                                                                                          |
| Nab-Paclitaxel, pancreatic | 2013                 | Nab-Paclitaxel for metastatic adenocarcinoma of the pancreas as first line treatment, in combination with gemcitabine                                                                                                                                                             | Pancreatic adenocarcinoma Stage 4 at diagnosis<br>Claim for gemcitabine (J9201) within 30 days for claim for nab-paclitaxel (J9264) and no prior claim for other intravenous systemic therapy (J9000-J9998) or capecitabine (J8520) from date of diagnosis to minimum claim date for nab-paclitaxel (J9264)                                                          | <a href="https://www.nejm.org/doi/full/10.1056/NEJMoa1304369">https://www.nejm.org/doi/full/10.1056/NEJMoa1304369</a>                                                                                                                                                                                                                                                    |
| Afatinib, NSCLC            | 2013                 | For patients with late stage (metastatic) non-small cell lung cancer (NSCLC) whose tumors express specific types of epidermal growth factor receptor (EGFR) gene mutations, as detected by an FDA-approved test. Data from LUX-Lung 3 trial of afatinib vs. cisplatin/pemetrexed. | Non-small cell lung cancer Stage 4 at diagnosis<br>Stage 3 at diagnosis with no surgery or radiation claim within 365 days of the minimum date of claim for afatinib<br><br>No prior claim for other intravenous systemic therapy (J9000-J9998), erlotinib, gefitinib, crizotinib, alectinib, or ceritinib from date of diagnosis to minimum claim date for afatinib | LUX Lung 3, LUX Lung 6<br><a href="https://www.thelancet.com/journals/lanonc/article/PIIS1470-2045(14)71173-8/fulltext">https://www.thelancet.com/journals/lanonc/article/PIIS1470-2045(14)71173-8/fulltext</a><br><br><a href="https://ascopubs.org/doi/abs/10.1200/jco.2012.30.18_suppl.lba7500">https://ascopubs.org/doi/abs/10.1200/jco.2012.30.18_suppl.lba7500</a> |
| Erlotinib, NSCLC           | 2013                 | The treatment of patients with metastatic non-small cell lung cancer whose tumors have epidermal growth factor                                                                                                                                                                    | Non-small cell lung cancer Stage 4 at diagnosis                                                                                                                                                                                                                                                                                                                      | EURTAC<br><a href="https://www.thelancet.com/action/showPdf?pii=S1470-2045%2811%2970393-X">https://www.thelancet.com/action/showPdf?pii=S1470-2045%2811%2970393-X</a>                                                                                                                                                                                                    |

| Drug                           | Approval Year | FDA Approved Indication                                                                                                                                                                                                                                     | SEER-Medicare Population Inclusion Criteria                                                                                                                                                                                                                                                                                                                                                  | Pivotal Cancer Clinical Trial                                                                                                                                                        |
|--------------------------------|---------------|-------------------------------------------------------------------------------------------------------------------------------------------------------------------------------------------------------------------------------------------------------------|----------------------------------------------------------------------------------------------------------------------------------------------------------------------------------------------------------------------------------------------------------------------------------------------------------------------------------------------------------------------------------------------|--------------------------------------------------------------------------------------------------------------------------------------------------------------------------------------|
|                                |               | receptor (EGFR) exon 19 deletions or exon 21 (L858R) substitution mutations as detected by an FDA-approved test receiving first-line, maintenance, or second or greater line treatment after progression following at least one prior chemotherapy regimen. | <p>Stage 3 at diagnosis with no surgery or radiation claim within 365 days of the minimum date of claim for erlotinib</p> <p>No prior claim for other intravenous systemic therapy (J9000-J9998), afatinib, gefitinib, crizotinib, alectinib, or ceritinib from date of diagnosis to minimum claim date for erlotinib</p>                                                                    |                                                                                                                                                                                      |
| Bevacizumab, Colorectal Cancer | 2013          | Metastatic colorectal cancer, in combination with fluoropyrimidine irinotecan- or fluoropyrimidine-oxaliplatin-based chemotherapy for second-line treatment in patients who have progressed on a first-line Avastin-containing regimen.                     | <p>Colon or rectal cancer<br/>Stage 4 at diagnosis<br/>Prior claim for bevacizumab (J9035) AND [fluorouracil (J9190) OR capecitabine (J8520, J8521)] AND [oxaliplatin (J9263) OR irinotecan (J9206)]<br/>At least one claim for [irinotecan (J9206) OR oxaliplatin (J9263)] AND [capecitabine (J8520, J8521) OR fluorouracil (J9190)] within 30 days of a claim for bevacizumab (J9035).</p> | <p>ML18147 Study<br/><a href="https://www.thelancet.com/action/showPdf?pii=S1470-2045%2812%2970477-1">https://www.thelancet.com/action/showPdf?pii=S1470-2045%2812%2970477-1</a></p> |

CRPC=Castrate Resistant Prostate Cancer; NET=Neuroendocrine tumor; NSCLC=Non-Small Cell Lung Cancer; RCC=Renal Cell Carcinoma

**eTable 2.** Cycle Estimates for Intravenous Cancer Drugs Used to Calculate Duration of Therapy and/or Single Cycles

| <b>Drug and Indication</b>                | <b>FDA Label Dosing Frequency</b>                                                                                                                                                                     | <b>Cycle Estimate in SEER-Medicare</b>                        |
|-------------------------------------------|-------------------------------------------------------------------------------------------------------------------------------------------------------------------------------------------------------|---------------------------------------------------------------|
| Pemetrexed, first line NSCLC              | Recommended dose is 500 mg/m <sup>2</sup> IV on Day 1 of each 21-day cycle in combination with cisplatin 75 mg/m <sup>2</sup> IV beginning 30 minutes after ALIMTA administration.                    | One claim every 21 days                                       |
| Nab-Paclitaxel, NSCLC                     | Recommended dose is 100 mg/m <sup>2</sup> over 30 minutes on Days 1, 8, and 15 of each 21-day cycle; administer carboplatin on Day 1 of each 21-day cycle immediately after ABRAXANE.                 | At least two claims for nab-paclitaxel within 21 days         |
| Nab-Paclitaxel, Pancreatic Adenocarcinoma | Recommended dose is 125 mg/m <sup>2</sup> IV over 30-40 minutes on Days 1, 8 and 15 of each 28-day cycle; administer gemcitabine on Days 1, 8 and 15 of each 28-day cycle immediately after ABRAXANE. | At least two claims for nab-paclitaxel within a 28 day period |
| Pemetrexed, maintenance NSCLC             | Recommended dose is 500 mg/m <sup>2</sup> IV on Day 1 of each 21-day cycle.                                                                                                                           | One claim every 21 days                                       |
| Cabazitaxel, CRPC                         | 20 mg/m <sup>2</sup> administered every three weeks as a one-hour intravenous infusion in combination with oral prednisone 10 mg administered daily throughout JEVTANA treatment.                     | One claim every 21 days                                       |
| Eribulin, Breast cancer                   | Administer 1.4 mg/m <sup>2</sup> intravenously over 2 to 5 minutes on Days 1 and 8 of a 21-day cycle.                                                                                                 | Two claims every 21 days                                      |
| Trastuzumab, Gastric cancer               | Initial dose of 8 mg/kg over 90 minutes IV infusion, followed by 6 mg/kg over 30 to 90 minutes IV infusion every 3 weeks.                                                                             | One claim every 21 days                                       |
| Cetuximab, Head and Neck                  | Administer 400 mg/m <sup>2</sup> initial dose as a 120-minute intravenous infusion followed by 250 mg/m <sup>2</sup> weekly infused over 60 minutes.                                                  | Three claims every 21 days                                    |
| Cetuximab, Colorectal cancer              | Administer 400 mg/m <sup>2</sup> initial dose as a 120-minute intravenous infusion followed by 250 mg/m <sup>2</sup> weekly infused over 60 minutes.                                                  | Three claims every 21 days                                    |



| <b>Drug and Indication</b>         | <b>FDA Label Dosing Frequency</b>                                                                                                                                                | <b>Cycle Estimate in SEER-Medicare</b> |
|------------------------------------|----------------------------------------------------------------------------------------------------------------------------------------------------------------------------------|----------------------------------------|
| Ipilimumab, Melanoma               | 3 mg/kg administered intravenously over 90 minutes every 3 weeks for a total of 4 doses.                                                                                         | One claim every 21 days                |
| Pertuzumab, Breast cancer          | The initial dose is 840 mg administered as a 60-minute intravenous infusion, followed every 3 weeks thereafter by 420 mg administered as a 30 to 60 minute intravenous infusion. | One claim every 21 days                |
| Ziv-Aflibercept, Colorectal cancer | 4 mg/kg as an intravenous infusion over 1 hour every 2 weeks                                                                                                                     | One claim every 14 days                |
| Ado-trastuzumab, Breast cancer     | The recommended dose of KADCYLA is 3.6 mg/kg given as an intravenous infusion every 3 weeks (21-day cycle)                                                                       | One claim every 21 days                |
| Bevacizumab, Colorectal            | 5 mg/kg IV every 2 weeks with bolus-IFL; 10 mg/kg IV every 2 weeks with FOLFOX4                                                                                                  | One claim every 14 days                |

CRPC=Castrate Resistant Prostate Cancer; NSCLC=Non-small cell lung cancer

**eTable 3.** Median Cancer-Specific Survival and Percent Deaths Due to Cancer Among SEER-Medicare Patients, Censored 12/31/2015

| <b>Drug and Indication</b>                | <b>Cancer-specific survival, median in months</b> | <b>Percent deaths attributed to cancer (%)</b> |
|-------------------------------------------|---------------------------------------------------|------------------------------------------------|
| Nab-Paclitaxel, NSCLC                     | 9.4                                               | 89.1                                           |
| Nab-Paclitaxel, Pancreatic Adenocarcinoma | 6.7                                               | 92.7                                           |
| Everolimus, Breast                        | 11.7                                              | 81.6                                           |
| Erlotinib, NSCLC                          | 7.0                                               | 90.6                                           |
| Pemetrexed, Maintenance NSCLC             | 16.2                                              | 89.6                                           |
| Everolimus, RCC                           | 10.9                                              | 86.1                                           |
| Pemetrexed, First Line NSCLC              | 15.7                                              | 88.1                                           |
| Pazopanib, RCC                            | 13.4                                              | 90.9                                           |
| Axitinib, RCC                             | 8.9                                               | 90.0                                           |
| Enzalutamide, CRPC                        | 8.7                                               | 92.1                                           |
| Abiraterone, No Prior Docetaxel CRPC      | 18.0                                              | 78.5                                           |
| Abiraterone, Prior Docetaxel CRPC         | 11.1                                              | 90.0                                           |
| Everolimus, Pancreatic NET                | 20.9                                              | 86.7                                           |
| Cabazitaxel, CRPC                         | 7.0                                               | 89.1                                           |
| Ipilimumab, Melanoma                      | 5.3                                               | 91.3                                           |
| Regorafenib, Colorectal                   | 4.7                                               | 90.5                                           |
| Eribulin, Breast                          | 7.9                                               | 95.8                                           |
| Vemurafenib, Melanoma                     | 5.3                                               | 92.4                                           |
| Ziv-Aflibercept, Colorectal               | 5.3                                               | 90.3                                           |
| Cetuximab, Colorectal                     | 11.2                                              | 89.9                                           |
| Pertuzumab, Breast                        | Not Reached                                       | 81.8                                           |
| Cetuximab, Head and Neck                  | 11.0                                              | 82.7                                           |

| <b>Drug and Indication</b>  | <b>Cancer-specific survival, median in months</b> | <b>Percent deaths attributed to cancer (%)</b> |
|-----------------------------|---------------------------------------------------|------------------------------------------------|
| Trastuzumab, Gastric        | 15.0                                              | 88.2                                           |
| Afatinib, NSCLC             | 12.0                                              | 78.9                                           |
| Ado trastuzumab, Breast     | 7.5                                               | 100.0                                          |
| Dabrafenib, Melanoma        | 9.8                                               | 85.2                                           |
| Erlotinib, First line NSCLC | 13.6                                              | 90.8                                           |
| Sipuleucel-T, CRPC          | 28.2                                              | 84.2                                           |
| Bevacizumab, Colorectal     | 9.7                                               | 93.6                                           |

CRPC=Castrate Resistant Prostate Cancer; NET=Neuroendocrine tumor; NSCLC=Non-Small Cell Lung Cancer; RCC=Renal Cell Carcinoma

**eTable 4.** Age-Specific Median Overall Survival or Hazard Ratios for Clinical Trial Intervention Arms

| <b>Drug Indication</b>               | <b>Age group</b> | <b>Trial Overall Survival, months</b> | <b>Hazard Ratio (95% CI)</b> |
|--------------------------------------|------------------|---------------------------------------|------------------------------|
| Enzalutamide CRPC                    | ≥ 65 years       | 18.4                                  | 0.63 (0.46-0.87)             |
|                                      | <65 years        | Not reached                           | 0.63 (0.51-0.78)             |
|                                      | All              | 18.4                                  | 0.63 (0.53-0.75)             |
| Abiraterone CRPC, prior docetaxel    | ≥ 65 years       | 16.2                                  | 0.76 (0.63-0.90)             |
|                                      | <65 years        | 15.0                                  | 0.69 (0.53-0.91)             |
|                                      | ≥ 75 years       | 15.6                                  | 0.64 (0.48-0.85)             |
|                                      | All              | 15.8                                  | 0.74 (0.64-0.86)             |
| Abiraterone CRPC, no prior docetaxel | ≥ 65 years       | 34.5                                  | 0.78 (0.59-1.03)             |
|                                      | <65 years        | 34.7                                  | 0.81 (0.69-0.96)             |
|                                      | All              | 34.7                                  | 0.81 (0.70-0.93)             |
| Nab-Paclitaxel, NSCLC                | ≥ 70 years       | 19.9                                  | 0.58, significant            |
|                                      | < 70 years       | 11.4                                  | 0.99, NS                     |
|                                      | All              | 12.1                                  | 0.92 (0.80-1.07)             |
| Cetuximab, Head and Neck             | ≥ 65 years       | 9.1                                   | 1.07 (0.65-1.77)             |
|                                      | <65 years        | 10.5                                  | 0.74 (0.59-0.94)             |
|                                      | All              | 10.1                                  | 0.80 (0.64-0.99)             |
| Afatinib, NSCLC                      | ≥ 65 years       | 27.6                                  | 0.94 (0.58-1.51)             |
|                                      | <65 years        | 29.4                                  | 0.59 (0.33-1.05)             |
|                                      | All              | 28.2                                  | 0.88 (0.66-1.17)             |

\*NS=Non-significant hazard ratio for overall survival as reported in trial publication

CRPC=Castrate Resistant Prostate Cancer; NSCLC=Non-Small Cell Lung Cancer
